# Supplementary material
Source: MDPI journal article supplement (https://www.mdpi.com/2073-4352/14/2/110)
Supplement: s1 [file s1]

| PDF#41-1432: QM=Common(+); d=Diffractometer; l=(Unknown)                  |        |             |           |                  |        |           |    |            |      |           |         |        | PDF Card |
|---------------------------------------------------------------------------|--------|-------------|-----------|------------------|--------|-----------|----|------------|------|-----------|---------|--------|----------|
| Pseudobrookite, syn<br>Fe2TiO5                                            |        |             |           |                  |        |           |    |            |      |           |         |        |          |
| Radiation=CuKa1                                                           |        |             |           | Lambda=1.5406    |        |           |    | Filter=    |      |           |         |        |          |
| Calibration=                                                              |        |             |           | 2T=17.760-79.819 |        |           |    | l/lc(RIR)= |      |           |         |        |          |
| Ref: Level-1 PDF                                                          |        |             |           |                  |        |           |    |            |      |           |         |        |          |
| Orthorhombic, Bbmm(63)                                                    |        |             |           |                  |        |           |    | Z=4        |      | mp=       |         |        |          |
| CELL: 9.7965 x 9.9805 x 3.7301 <90.0 x 90.0 x 90.0>                       |        |             |           |                  |        |           |    | P.S=       |      |           |         |        |          |
| Density(c)=4.39                                                           |        | Density(m)= |           | Mwt=             |        | Vol=364.7 |    |            |      |           |         |        |          |
| Ref: Ibid.                                                                |        |             |           |                  |        |           |    |            |      |           |         |        |          |
|                                                                           |        |             |           |                  |        |           |    |            |      |           |         |        |          |
| Strong Lines: 3.49/X 2.75/8 4.90/4 2.46/2 1.87/2 1.97/2 2.41/2 1.54/2     |        |             |           |                  |        |           |    |            |      |           |         |        |          |
| 65 Lines, Wavelength to Compute Theta = 1.54056?(Cu), l%-Type = (Unknown) |        |             |           |                  |        |           |    |            |      |           |         |        |          |
| #                                                                         | d(?)   | l(f)        | ( h k l ) | 2-Theta          | Theta  | 1/(2d)    | #  | d(?)       | l(f) | ( h k l ) | 2-Theta | Theta  | 1/(2d)   |
| 1                                                                         | 4.9900 | 13.0        | ( 0 2 0 ) | 17.760           | 8.880  | 0.1002    | 34 | 1.5441     | 18.0 | ( 2 3 2 ) | 59.848  | 29.924 | 0.3238   |
| 2                                                                         | 4.9010 | 42.0        | ( 2 0 0 ) | 18.085           | 9.043  | 0.1020    | 35 | 1.5387     | 17.0 | ( 5 3 1 ) | 60.080  | 30.040 | 0.3249   |
| 3                                                                         | 3.4860 | 100.0       | ( 1 0 1 ) | 25.531           | 12.766 | 0.1434    | 36 | 1.5013     | 3.0  | ( 1 6 1 ) | 61.738  | 30.869 | 0.3330   |
| 4                                                                         | 3.2940 | 6.0         | ( 1 1 1 ) | 27.047           | 13.523 | 0.1518    | 37 | 1.4939     | 1.0  | ( 0 4 2 ) | 62.077  | 31.039 | 0.3347   |
| 5                                                                         | 2.8590 | 4.0         | ( 1 2 1 ) | 31.260           | 15.630 | 0.1749    | 38 | 1.4838     | 3.0  | ( 4 0 2 ) | 62.547  | 31.274 | 0.3370   |
| 6                                                                         | 2.7520 | 77.0        | ( 2 3 0 ) | 32.508           | 16.254 | 0.1817    | 39 | 1.4678     | 1.0  | ( 4 1 2 ) | 63.308  | 31.654 | 0.3406   |
| 7                                                                         | 2.4960 | 1.0         | ( 0 4 0 ) | 35.950           | 17.975 | 0.2003    | 40 | 1.4657     | 1.0  | ( 6 3 0 ) | 63.409  | 31.704 | 0.3411   |
| 8                                                                         | 2.4580 | 23.0        | ( 3 0 1 ) | 36.526           | 18.263 | 0.2034    | 41 | 1.4290     | 2.0  | ( 2 4 2 ) | 65.236  | 32.618 | 0.3499   |
| 9                                                                         | 2.4510 | 16.0        | ( 4 0 0 ) | 36.634           | 18.317 | 0.2040    | 42 | 1.4243     | 5.0  | ( 5 4 1 ) | 65.478  | 32.739 | 0.3510   |
| 10                                                                        | 2.4070 | 22.0        | ( 1 3 1 ) | 37.328           | 18.664 | 0.2077    | 43 | 1.4224     | 5.0  | ( 4 2 2 ) | 65.576  | 32.788 | 0.3515   |
| 11                                                                        | 2.3860 | 1.0         | ( 3 1 1 ) | 37.669           | 18.834 | 0.2096    | 44 | 1.3775     | 4.0  | ( 3 6 1 ) | 67.999  | 34.000 | 0.3630   |
| 12                                                                        | 2.2240 | 10.0        | ( 2 4 0 ) | 40.528           | 20.264 | 0.2248    | 45 | 1.3761     | 4.0  | ( 4 6 0 ) | 68.078  | 34.039 | 0.3633   |
| 13                                                                        | 2.2040 | 3.0         | ( 3 2 1 ) | 40.912           | 20.456 | 0.2269    | 46 | 1.3689     | 1.0  | ( 2 7 0 ) | 68.485  | 34.243 | 0.3653   |
| 14                                                                        | 2.1990 | 12.0        | ( 4 2 0 ) | 41.010           | 20.505 | 0.2274    | 47 | 1.3662     | 1.0  | ( 6 4 0 ) | 68.640  | 34.320 | 0.3660   |
| 15                                                                        | 2.0290 | 1.0         | ( 1 4 1 ) | 44.622           | 22.311 | 0.2464    | 48 | 1.3552     | 7.0  | ( 4 3 2 ) | 69.276  | 34.638 | 0.3689   |
| 16                                                                        | 1.9766 | 14.0        | ( 3 3 1 ) | 45.872           | 22.936 | 0.2530    | 49 | 1.3194     | 2.0  | ( 1 7 1 ) | 71.438  | 35.719 | 0.3790   |
| 17                                                                        | 1.9733 | 22.0        | ( 4 3 0 ) | 45.953           | 22.976 | 0.2534    | 50 | 1.3127     | 3.0  | ( 2 5 2 ) | 71.859  | 35.930 | 0.3809   |
| 18                                                                        | 1.8657 | 23.0        | ( 0 0 2 ) | 48.770           | 24.385 | 0.2680    | 51 | 1.3104     | 3.0  | ( 7 0 1 ) | 72.005  | 36.002 | 0.3816   |
| 19                                                                        | 1.8480 | 7.0         | ( 2 5 0 ) | 49.268           | 24.634 | 0.2706    | 52 | 1.3096     | 2.0  | ( 5 5 1 ) | 72.056  | 36.028 | 0.3818   |
| 20                                                                        | 1.7516 | 8.0         | ( 3 4 1 ) | 52.177           | 26.088 | 0.2855    | 53 | 1.2991     | 3.0  | ( 7 1 1 ) | 72.731  | 36.365 | 0.3849   |
| 21                                                                        | 1.7473 | 12.0        | ( 4 4 0 ) | 52.315           | 26.157 | 0.2862    | 54 | 1.2672     | 3.0  | ( 7 2 1 ) | 74.870  | 37.435 | 0.3946   |
| 22                                                                        | 1.7430 | 4.0         | ( 2 0 2 ) | 52.454           | 26.227 | 0.2869    | 55 | 1.2636     | 3.0  | ( 6 5 0 ) | 75.120  | 37.560 | 0.3957   |
| 23                                                                        | 1.7335 | 2.0         | ( 5 0 1 ) | 52.763           | 26.382 | 0.2884    | 56 | 1.2477     | 1.0  | ( 0 8 0 ) | 76.247  | 38.124 | 0.4007   |
| 24                                                                        | 1.7092 | 1.0         | ( 5 1 1 ) | 53.573           | 26.786 | 0.2925    | 57 | 1.2412     | 4.0  | ( 0 6 2 ) | 76.719  | 38.359 | 0.4028   |
| 25                                                                        | 1.6634 | 10.0        | ( 0 6 0 ) | 55.171           | 27.586 | 0.3006    | 58 | 1.2333     | 2.0  | ( 1 0 3 ) | 77.301  | 38.651 | 0.4054   |
| 26                                                                        | 1.6455 | 2.0         | ( 2 2 2 ) | 55.824           | 27.912 | 0.3039    | 59 | 1.2323     | 3.0  | ( 4 7 0 ) | 77.375  | 38.688 | 0.4057   |
| 27                                                                        | 1.6383 | 11.0        | ( 5 2 1 ) | 56.091           | 28.045 | 0.3052    | 60 | 1.2284     | 1.0  | ( 6 0 2 ) | 77.667  | 38.834 | 0.4070   |
| 28                                                                        | 1.6327 | 1.0         | ( 6 0 0 ) | 56.300           | 28.150 | 0.3062    | 61 | 1.2244     | 2.0  | ( 8 0 0 ) | 77.969  | 38.984 | 0.4084   |
| 29                                                                        | 1.6112 | 3.0         | ( 6 1 0 ) | 57.120           | 28.560 | 0.3103    | 62 | 1.2190     | 2.0  | ( 6 1 2 ) | 78.380  | 39.190 | 0.4102   |
| 30                                                                        | 1.5752 | 2.0         | ( 2 6 0 ) | 58.550           | 29.275 | 0.3174    | 63 | 1.2154     | 1.0  | ( 8 1 0 ) | 78.657  | 39.329 | 0.4114   |
| 31                                                                        | 1.5521 | 8.0         | ( 6 2 0 ) | 59.509           | 29.754 | 0.3221    | 64 | 1.2034     | 1.0  | ( 2 6 2 ) | 79.597  | 39.798 | 0.4155   |
| 32                                                                        | 1.5493 | 3.0         | ( 3 5 1 ) | 59.627           | 29.814 | 0.3227    | 65 | 1.2006     | 1.0  | ( 5 6 1 ) | 79.819  | 39.910 | 0.4165   |
| 33                                                                        | 1.5474 | 3.0         | ( 4 5 0 ) | 59.708           | 29.854 | 0.3231    |    |            |      |           |         |        |          |
|                                                                           |        |             |           |                  |        |           |    |            |      |           |         |        |          |
