# Supplementary material
Source: MDPI journal article supplement (https://www.mdpi.com/2073-4352/14/2/110)
Supplement: s1 [file s1]

| PDF#34-0189: QM=Common(+); d=Diffractometer; l=(Unknown)                  |        |             |           |                  |        |           |    |            |      |           |         |        | PDF Card |
|---------------------------------------------------------------------------|--------|-------------|-----------|------------------|--------|-----------|----|------------|------|-----------|---------|--------|----------|
| Forsterite, syn<br>Mg2SiO4                                                |        |             |           |                  |        |           |    |            |      |           |         |        |          |
| Radiation=CuKa1                                                           |        |             |           | Lambda=1.5406    |        |           |    | Filter=    |      |           |         |        |          |
| Calibration=                                                              |        |             |           | 2T=17.367-79.388 |        |           |    | l/Ic(RIR)= |      |           |         |        |          |
| Ref: Level-1 PDF                                                          |        |             |           |                  |        |           |    |            |      |           |         |        |          |
| Orthorhombic, Pmnb(62)                                                    |        |             |           |                  |        |           |    | Z=4        |      | mp=       |         |        |          |
| CELL: 5.9817 x 10.1978 x 4.7553 <90.0 x 90.0 x 90.0>                      |        |             |           |                  |        |           |    | P.S=       |      |           |         |        |          |
| Density(c)=3.275                                                          |        | Density(m)= |           | Mwt=             |        | Vol=290.1 |    |            |      |           |         |        |          |
| Ref: Ibid.                                                                |        |             |           |                  |        |           |    |            |      |           |         |        |          |
|                                                                           |        |             |           |                  |        |           |    |            |      |           |         |        |          |
| Strong Lines: 2.46/X 2.51/8 3.88/8 1.75/7 2.77/7 2.27/6 2.25/4 1.48/3     |        |             |           |                  |        |           |    |            |      |           |         |        |          |
| 69 Lines, Wavelength to Compute Theta = 1.54056?(Cu), l%-Type = (Unknown) |        |             |           |                  |        |           |    |            |      |           |         |        |          |
| #                                                                         | d(?)   | l(f)        | ( h k l ) | 2-Theta          | Theta  | 1/(2d)    | #  | d(?)       | l(f) | ( h k l ) | 2-Theta | Theta  | 1/(2d)   |
| 1                                                                         | 5.1021 | 22.0        | ( 0 2 0 ) | 17.367           | 8.683  | 0.0980    | 36 | 1.5666     | 8.0  | ( 0 1 3 ) | 58.905  | 29.452 | 0.3192   |
| 2                                                                         | 4.3075 | 4.0         | ( 0 1 1 ) | 20.602           | 10.301 | 0.1161    | 37 | 1.5323     | 2.0  | ( 1 0 3 ) | 60.355  | 30.178 | 0.3263   |
| 3                                                                         | 3.8812 | 76.0        | ( 1 2 0 ) | 22.894           | 11.447 | 0.1288    | 38 | 1.5144     | 10.0 | ( 1 1 3 ) | 61.144  | 30.572 | 0.3302   |
| 4                                                                         | 3.7222 | 25.0        | ( 1 0 1 ) | 23.886           | 11.943 | 0.1343    | 39 | 1.5111     | 9.0  | ( 3 1 2 ) | 61.293  | 30.647 | 0.3309   |
| 5                                                                         | 3.4960 | 26.0        | ( 1 1 1 ) | 25.457           | 12.729 | 0.1430    | 40 | 1.5032     | 11.0 | ( 2 4 2 ) | 61.649  | 30.825 | 0.3326   |
| 6                                                                         | 3.4767 | 22.0        | ( 0 2 1 ) | 25.600           | 12.800 | 0.1438    | 41 | 1.4990     | 20.0 | ( 1 5 2 ) | 61.843  | 30.922 | 0.3336   |
| 7                                                                         | 3.0065 | 14.0        | ( 1 2 1 ) | 29.690           | 14.845 | 0.1663    | 42 | 1.4954     | 30.0 | ( 4 0 0 ) | 62.006  | 31.003 | 0.3343   |
| 8                                                                         | 2.9906 | 18.0        | ( 2 0 0 ) | 29.851           | 14.926 | 0.1672    | 43 | 1.4779     | 33.0 | ( 2 6 0 ) | 62.823  | 31.412 | 0.3383   |
| 9                                                                         | 2.7653 | 66.0        | ( 0 3 1 ) | 32.347           | 16.174 | 0.1808    | 44 | 1.4674     | 3.0  | ( 1 2 3 ) | 63.326  | 31.663 | 0.3407   |
| 10                                                                        | 2.5097 | 83.0        | ( 1 3 1 ) | 35.747           | 17.874 | 0.1992    | 45 | 1.4638     | 3.0  | ( 3 2 2 ) | 63.503  | 31.752 | 0.3416   |
| 11                                                                        | 2.4567 | 100.0       | ( 2 1 1 ) | 36.546           | 18.273 | 0.2035    | 46 | 1.4365     | 4.0  | ( 0 3 3 ) | 64.851  | 32.426 | 0.3481   |
| 12                                                                        | 2.3456 | 13.0        | ( 1 4 0 ) | 38.343           | 19.171 | 0.2132    | 47 | 1.4111     | 2.0  | ( 2 6 1 ) | 66.170  | 33.085 | 0.3543   |
| 13                                                                        | 2.3150 | 13.0        | ( 0 1 2 ) | 38.869           | 19.434 | 0.2160    | 48 | 1.3968     | 13.0 | ( 1 3 3 ) | 66.932  | 33.466 | 0.3580   |
| 14                                                                        | 2.2673 | 57.0        | ( 2 2 1 ) | 39.721           | 19.861 | 0.2205    | 49 | 1.3930     | 28.0 | ( 3 3 2 ) | 67.141  | 33.571 | 0.3589   |
| 15                                                                        | 2.2470 | 37.0        | ( 0 4 1 ) | 40.095           | 20.048 | 0.2225    | 50 | 1.3874     | 9.0  | ( 2 1 3 ) | 67.446  | 33.723 | 0.3604   |
| 16                                                                        | 2.1589 | 23.0        | ( 1 1 2 ) | 41.806           | 20.903 | 0.2316    | 51 | 1.3748     | 2.0  | ( 2 5 2 ) | 68.153  | 34.077 | 0.3637   |
| 17                                                                        | 2.0303 | 7.0         | ( 2 3 1 ) | 44.592           | 22.296 | 0.2463    | 52 | 1.3657     | 1.0  | ( 3 5 1 ) | 68.666  | 34.333 | 0.3661   |
| 18                                                                        | 1.9479 | 6.0         | ( 0 3 2 ) | 46.588           | 23.294 | 0.2567    | 53 | 1.3505     | 22.0 | ( 2 2 3 ) | 69.551  | 34.775 | 0.3702   |
| 19                                                                        | 1.9407 | 5.0         | ( 2 4 0 ) | 46.771           | 23.385 | 0.2576    | 54 | 1.3464     | 15.0 | ( 0 4 3 ) | 69.791  | 34.896 | 0.3713   |
| 20                                                                        | 1.8744 | 8.0         | ( 0 5 1 ) | 48.530           | 24.265 | 0.2668    | 55 | 1.3155     | 11.0 | ( 4 3 1 ) | 71.683  | 35.842 | 0.3801   |
| 21                                                                        | 1.8608 | 3.0         | ( 2 0 2 ) | 48.907           | 24.453 | 0.2687    | 56 | 1.3131     | 9.0  | ( 1 4 3 ) | 71.836  | 35.918 | 0.3808   |
| 22                                                                        | 1.8569 | 2.0         | ( 3 2 0 ) | 49.017           | 24.508 | 0.2693    | 57 | 1.2937     | 5.0  | ( 3 6 0 ) | 73.083  | 36.541 | 0.3865   |
| 23                                                                        | 1.8388 | 1.0         | ( 3 0 1 ) | 49.532           | 24.766 | 0.2719    | 58 | 1.2661     | 2.0  | ( 4 0 2 ) | 74.948  | 37.474 | 0.3949   |
| 24                                                                        | 1.8299 | 1.0         | ( 2 1 2 ) | 49.788           | 24.894 | 0.2732    | 59 | 1.2627     | 1.0  | ( 2 7 1 ) | 75.183  | 37.591 | 0.3960   |
| 25                                                                        | 1.8090 | 4.0         | ( 3 1 1 ) | 50.404           | 25.202 | 0.2764    | 60 | 1.2561     | 3.0  | ( 4 1 2 ) | 75.648  | 37.824 | 0.3981   |
| 26                                                                        | 1.7886 | 5.0         | ( 1 5 1 ) | 51.019           | 25.509 | 0.2795    | 61 | 1.2515     | 1.0  | ( 0 5 3 ) | 75.973  | 37.986 | 0.3995   |
| 27                                                                        | 1.7483 | 73.0        | ( 2 2 2 ) | 52.283           | 26.142 | 0.2860    | 62 | 1.2478     | 3.0  | ( 3 6 1 ) | 76.244  | 38.122 | 0.4007   |
| 28                                                                        | 1.7386 | 24.0        | ( 0 4 2 ) | 52.596           | 26.298 | 0.2876    | 63 | 1.2448     | 3.0  | ( 4 4 1 ) | 76.454  | 38.227 | 0.4017   |
| 29                                                                        | 1.7294 | 6.0         | ( 3 2 1 ) | 52.898           | 26.449 | 0.2891    | 64 | 1.2411     | 3.0  | ( 3 0 3 ) | 76.724  | 38.362 | 0.4029   |
| 30                                                                        | 1.6698 | 16.0        | ( 1 4 2 ) | 54.942           | 27.471 | 0.2994    | 65 | 1.2317     | 1.0  | ( 3 1 3 ) | 77.418  | 38.709 | 0.4059   |
| 31                                                                        | 1.6347 | 15.0        | ( 1 6 0 ) | 56.224           | 28.112 | 0.3059    | 66 | 1.2276     | 2.0  | ( 2 4 3 ) | 77.729  | 38.865 | 0.4073   |
| 32                                                                        | 1.6173 | 17.0        | ( 3 3 1 ) | 56.884           | 28.442 | 0.3092    | 67 | 1.2228     | 2.0  | ( 3 5 2 ) | 78.087  | 39.044 | 0.4089   |
| 33                                                                        | 1.6008 | 2.0         | ( 0 6 1 ) | 57.526           | 28.763 | 0.3123    | 68 | 1.2160     | 1.0  | ( 1 7 2 ) | 78.612  | 39.306 | 0.4112   |
| 34                                                                        | 1.5884 | 4.0         | ( 2 5 1 ) | 58.018           | 29.009 | 0.3148    | 69 | 1.2060     | 1.0  | ( 1 8 1 ) | 79.388  | 39.694 | 0.4146   |
| 35                                                                        | 1.5708 | 11.0        | ( 3 4 0 ) | 58.732           | 29.366 | 0.3183    |    |            |      |           |         |        |          |
|                                                                           |        |             |           |                  |        |           |    |            |      |           |         |        |          |
