# Supplementary material
Source: MDPI journal article supplement (https://www.mdpi.com/2073-4352/14/2/110)
Supplement: s1 [file s1]

| PDF#35-0792: QM=Common(+); d=Diffractometer; l=(Unknown)                  |        |             |           |                  |        |           |    |            |      |           |         |        | PDF Card |
|---------------------------------------------------------------------------|--------|-------------|-----------|------------------|--------|-----------|----|------------|------|-----------|---------|--------|----------|
| Magnesium Titanium Oxide                                                  |        |             |           |                  |        |           |    |            |      |           |         |        |          |
| MgTi2O5                                                                   |        |             |           |                  |        |           |    |            |      |           |         |        |          |
| Radiation=CuKa1                                                           |        |             |           | Lambda=1.5406    |        |           |    | Filter=    |      |           |         |        |          |
| Calibration=                                                              |        |             |           | 2T=17.763-88.845 |        |           |    | I/Ic(RIR)= |      |           |         |        |          |
| Ref: Level-1 PDF                                                          |        |             |           |                  |        |           |    |            |      |           |         |        |          |
| Orthorhombic, Bbmm(63)                                                    |        |             |           |                  |        |           |    | Z=4        |      | mp=       |         |        |          |
| CELL: 9.7501 x 9.9802 x 3.7483 <90.0 x 90.0 x 90.0>                       |        |             |           |                  |        |           |    | P.S=       |      |           |         |        |          |
| Density(c)=3.644                                                          |        | Density(m)= |           | Mwt=             |        | Vol=364.7 |    |            |      |           |         |        |          |
| Ref: Ibid.                                                                |        |             |           |                  |        |           |    |            |      |           |         |        |          |
|                                                                           |        |             |           |                  |        |           |    |            |      |           |         |        |          |
| Strong Lines: 3.50/X 2.75/8 1.87/4 1.55/4 4.88/3 1.97/3 1.53/3 2.19/2     |        |             |           |                  |        |           |    |            |      |           |         |        |          |
| 69 Lines, Wavelength to Compute Theta = 1.54056?(Cu), I%-Type = (Unknown) |        |             |           |                  |        |           |    |            |      |           |         |        |          |
| #                                                                         | d(?)   | I(f)        | ( h k l ) | 2-Theta          | Theta  | 1/(2d)    | #  | d(?)       | I(f) | ( h k l ) | 2-Theta | Theta  | 1/(2d)   |
| 1                                                                         | 4.9893 | 20.0        | ( 0 2 0 ) | 17.763           | 8.881  | 0.1002    | 36 | 1.5025     | 8.0  | ( 1 6 1 ) | 61.682  | 30.841 | 0.3328   |
| 2                                                                         | 4.8776 | 32.0        | ( 2 0 0 ) | 18.173           | 9.086  | 0.1025    | 37 | 1.4986     | 3.0  | ( 0 4 2 ) | 61.860  | 30.930 | 0.3336   |
| 3                                                                         | 4.3805 | 4.0         | ( 2 1 0 ) | 20.255           | 10.128 | 0.1141    | 38 | 1.4853     | 3.0  | ( 4 0 2 ) | 62.478  | 31.239 | 0.3366   |
| 4                                                                         | 3.4988 | 100.0       | ( 1 0 1 ) | 25.436           | 12.718 | 0.1429    | 39 | 1.4598     | 5.0  | ( 6 3 0 ) | 63.696  | 31.848 | 0.3425   |
| 5                                                                         | 3.3016 | 5.0         | ( 1 1 1 ) | 26.983           | 13.492 | 0.1514    | 40 | 1.4321     | 7.0  | ( 2 4 2 ) | 65.075  | 32.538 | 0.3491   |
| 6                                                                         | 2.8636 | 9.0         | ( 1 2 1 ) | 31.208           | 15.604 | 0.1746    | 41 | 1.4240     | 11.0 | ( 4 2 2 ) | 65.493  | 32.747 | 0.3511   |
| 7                                                                         | 2.7478 | 80.0        | ( 2 3 0 ) | 32.559           | 16.280 | 0.1820    | 42 | 1.3772     | 7.0  | ( 3 6 1 ) | 68.013  | 34.007 | 0.3630   |
| 8                                                                         | 2.4944 | 1.0         | ( 0 4 0 ) | 35.974           | 17.987 | 0.2004    | 43 | 1.3739     | 3.0  | ( 4 6 0 ) | 68.200  | 34.100 | 0.3639   |
| 9                                                                         | 2.4559 | 20.0        | ( 3 0 1 ) | 36.558           | 18.279 | 0.2036    | 44 | 1.3686     | 4.0  | ( 2 7 0 ) | 68.501  | 34.250 | 0.3653   |
| 10                                                                        | 2.4374 | 9.0         | ( 4 0 0 ) | 36.845           | 18.423 | 0.2051    | 45 | 1.3569     | 13.0 | ( 4 3 2 ) | 69.177  | 34.589 | 0.3685   |
| 11                                                                        | 2.4108 | 18.0        | ( 1 3 1 ) | 37.267           | 18.634 | 0.2074    | 46 | 1.3202     | 5.0  | ( 1 7 1 ) | 71.390  | 35.695 | 0.3787   |
| 12                                                                        | 2.3846 | 2.0         | ( 3 1 1 ) | 37.692           | 18.846 | 0.2097    | 47 | 1.3152     | 10.0 | ( 2 5 2 ) | 71.699  | 35.849 | 0.3802   |
| 13                                                                        | 2.3690 | 2.0         | ( 4 1 0 ) | 37.949           | 18.974 | 0.2111    | 48 | 1.3072     | 3.0  | ( 5 5 1 ) | 72.210  | 36.105 | 0.3825   |
| 14                                                                        | 2.2213 | 21.0        | ( 2 4 0 ) | 40.579           | 20.289 | 0.2251    | 49 | 1.3053     | 3.0  | ( 7 0 1 ) | 72.332  | 36.166 | 0.3831   |
| 15                                                                        | 2.1889 | 22.0        | ( 4 2 0 ) | 41.208           | 20.604 | 0.2284    | 50 | 1.2947     | 6.0  | ( 7 1 1 ) | 73.017  | 36.508 | 0.3862   |
| 16                                                                        | 2.0311 | 2.0         | ( 1 4 1 ) | 44.573           | 22.286 | 0.2462    | 51 | 1.2633     | 9.0  | ( 7 2 1 ) | 75.139  | 37.570 | 0.3958   |
| 17                                                                        | 1.9753 | 12.0        | ( 3 3 1 ) | 45.903           | 22.951 | 0.2531    | 52 | 1.2604     | 5.0  | ( 6 5 0 ) | 75.347  | 37.673 | 0.3967   |
| 18                                                                        | 1.9662 | 31.0        | ( 4 3 0 ) | 46.129           | 23.064 | 0.2543    | 53 | 1.2474     | 2.0  | ( 0 8 0 ) | 76.271  | 38.135 | 0.4008   |
| 19                                                                        | 1.8737 | 38.0        | ( 0 0 2 ) | 48.548           | 24.274 | 0.2669    | 54 | 1.2439     | 8.0  | ( 0 6 2 ) | 76.524  | 38.262 | 0.4020   |
| 20                                                                        | 1.8471 | 18.0        | ( 2 5 0 ) | 49.294           | 24.647 | 0.2707    | 55 | 1.2330     | 2.0  | ( 3 7 1 ) | 77.320  | 38.660 | 0.4055   |
| 21                                                                        | 1.7547 | 4.0         | ( 0 2 2 ) | 52.076           | 26.038 | 0.2849    | 56 | 1.2306     | 2.0  | ( 4 7 0 ) | 77.506  | 38.753 | 0.4063   |
| 22                                                                        | 1.7495 | 20.0        | ( 2 0 2 ) | 52.243           | 26.121 | 0.2858    | 57 | 1.2279     | 2.0  | ( 6 0 2 ) | 77.707  | 38.853 | 0.4072   |
| 23                                                                        | 1.7337 | 3.0         | ( 1 5 1 ) | 52.758           | 26.379 | 0.2884    | 58 | 1.2186     | 3.0  | ( 6 1 2 ) | 78.414  | 39.207 | 0.4103   |
| 24                                                                        | 1.7295 | 3.0         | ( 5 0 1 ) | 52.894           | 26.447 | 0.2891    | 59 | 1.2153     | 3.0  | ( 7 3 1 ) | 78.663  | 39.331 | 0.4114   |
| 25                                                                        | 1.7226 | 1.0         | ( 2 1 2 ) | 53.125           | 26.562 | 0.2903    | 60 | 1.2053     | 4.0  | ( 2 6 2 ) | 79.443  | 39.721 | 0.4148   |
| 26                                                                        | 1.7044 | 4.0         | ( 5 1 1 ) | 53.737           | 26.868 | 0.2934    | 61 | 1.1839     | 2.0  | ( 8 2 0 ) | 81.176  | 40.588 | 0.4223   |
| 27                                                                        | 1.6638 | 16.0        | ( 0 6 0 ) | 55.156           | 27.578 | 0.3005    | 62 | 1.1663     | 3.0  | ( 3 0 3 ) | 82.671  | 41.336 | 0.4287   |
| 28                                                                        | 1.6503 | 3.0         | ( 2 2 2 ) | 55.647           | 27.823 | 0.3030    | 63 | 1.1615     | 3.0  | ( 1 3 3 ) | 83.083  | 41.542 | 0.4305   |
| 29                                                                        | 1.6342 | 18.0        | ( 5 2 1 ) | 56.245           | 28.123 | 0.3060    | 64 | 1.1586     | 2.0  | ( 3 1 3 ) | 83.343  | 41.672 | 0.4316   |
| 30                                                                        | 1.6252 | 3.0         | ( 6 0 0 ) | 56.583           | 28.291 | 0.3077    | 65 | 1.1569     | 2.0  | ( 7 4 1 ) | 83.489  | 41.744 | 0.4322   |
| 31                                                                        | 1.6042 | 6.0         | ( 6 1 0 ) | 57.392           | 28.696 | 0.3117    | 66 | 1.1519     | 3.0  | ( 6 3 2 ) | 83.931  | 41.965 | 0.4341   |
| 32                                                                        | 1.5741 | 5.0         | ( 2 6 0 ) | 58.596           | 29.298 | 0.3176    | 67 | 1.1123     | 3.0  | ( 3 8 1 ) | 87.657  | 43.829 | 0.4495   |
| 33                                                                        | 1.5482 | 37.0        | ( 2 3 2 ) | 59.673           | 29.836 | 0.3229    | 68 | 1.1107     | 2.0  | ( 4 8 0 ) | 87.821  | 43.910 | 0.4502   |
| 34                                                                        | 1.5443 | 20.0        | ( 4 5 0 ) | 59.840           | 29.920 | 0.3238    | 69 | 1.1005     | 3.0  | ( 3 3 3 ) | 88.845  | 44.422 | 0.4543   |
| 35                                                                        | 1.5349 | 25.0        | ( 5 3 1 ) | 60.245           | 30.123 | 0.3258    |    |            |      |           |         |        |          |
|                                                                           |        |             |           |                  |        |           |    |            |      |           |         |        |          |
