# Supplementary material
Source: MDPI journal article supplement (https://www.mdpi.com/2073-4352/14/2/110)
Supplement: s1 [file s1]

|                                                                           |        |             |            |         |                   |           |    |        |               |            |         |        |          |
|---------------------------------------------------------------------------|--------|-------------|------------|---------|-------------------|-----------|----|--------|---------------|------------|---------|--------|----------|
| PDF#33-0664: QM=Common(+); d=Diffractometer; l=(Unknown)                  |        |             |            |         |                   |           |    |        |               |            |         |        | PDF Card |
| Hematite, syn<br>Fe2O3                                                    |        |             |            |         |                   |           |    |        |               |            |         |        |          |
| Radiation=CuKa1                                                           |        |             |            |         | Lambda=1.5406     |           |    |        | Filter=       |            |         |        |          |
| Calibration=                                                              |        |             |            |         | 2T=24.138-147.961 |           |    |        | I/Ic(RIR)=2.4 |            |         |        |          |
| Ref: Level-1 PDF                                                          |        |             |            |         |                   |           |    |        |               |            |         |        |          |
| Hexagonal, R-3c(167)                                                      |        |             |            |         |                   |           |    | Z=6    |               | mp=        |         |        |          |
| CELL: 5.0356 x 5.0356 x 13.7489 <90.0 x 90.0 x 120.0>                     |        |             |            |         |                   |           |    | P.S=   |               |            |         |        |          |
| Density(c)=5.26                                                           |        | Density(m)= |            | Mwt=    |                   | Vol=301.9 |    |        |               |            |         |        |          |
| Ref: Ibid.                                                                |        |             |            |         |                   |           |    |        |               |            |         |        |          |
|                                                                           |        |             |            |         |                   |           |    |        |               |            |         |        |          |
| Strong Lines: 2.70/X 2.52/7 1.69/5 1.84/4 3.68/3 1.49/3 1.45/3 2.21/2     |        |             |            |         |                   |           |    |        |               |            |         |        |          |
| 45 Lines, Wavelength to Compute Theta = 1.54056?(Cu), I%-Type = (Unknown) |        |             |            |         |                   |           |    |        |               |            |         |        |          |
| #                                                                         | d(?)   | I(f)        | ( h k l )  | 2-Theta | Theta             | 1/(2d)    | #  | d(?)   | I(f)          | ( h k l )  | 2-Theta | Theta  | 1/(2d)   |
| 1                                                                         | 3.6840 | 30.0        | ( 0 1 2 )  | 24.138  | 12.069            | 0.1357    | 24 | 1.1035 | 7.0           | ( 2 2 6 )  | 88.539  | 44.269 | 0.4531   |
| 2                                                                         | 2.7000 | 100.0       | ( 1 0 4 )  | 33.152  | 16.576            | 0.1852    | 25 | 1.0768 | 2.0           | ( 0 4 2 )  | 91.342  | 45.671 | 0.4643   |
| 3                                                                         | 2.5190 | 70.0        | ( 1 1 0 )  | 35.611  | 17.806            | 0.1985    | 26 | 1.0557 | 7.0           | ( 2 1 10 ) | 93.712  | 46.856 | 0.4736   |
| 4                                                                         | 2.2920 | 3.0         | ( 0 0 6 )  | 39.276  | 19.638            | 0.2182    | 27 | 1.0428 | 1.0           | ( 1 1 12 ) | 95.236  | 47.618 | 0.4795   |
| 5                                                                         | 2.2070 | 20.0        | ( 1 1 3 )  | 40.854  | 20.427            | 0.2266    | 28 | 1.0393 | 3.0           | ( 4 0 4 )  | 95.659  | 47.830 | 0.4811   |
| 6                                                                         | 2.0779 | 3.0         | ( 2 0 2 )  | 43.518  | 21.759            | 0.2406    | 29 | 0.9892 | 4.0           | ( 3 1 8 )  | 102.282 | 51.141 | 0.5055   |
| 7                                                                         | 1.8406 | 40.0        | ( 0 2 4 )  | 49.479  | 24.740            | 0.2717    | 30 | 0.9715 | 1.0           | ( 2 2 9 )  | 104.910 | 52.455 | 0.5147   |
| 8                                                                         | 1.6941 | 45.0        | ( 1 1 6 )  | 54.089  | 27.045            | 0.2951    | 31 | 0.9606 | 5.0           | ( 3 2 4 )  | 106.619 | 53.309 | 0.5205   |
| 9                                                                         | 1.6367 | 1.0         | ( 2 1 1 )  | 56.150  | 28.075            | 0.3055    | 32 | 0.9581 | 4.0           | ( 0 1 14 ) | 107.021 | 53.511 | 0.5219   |
| 10                                                                        | 1.6033 | 5.0         | ( 1 2 2 )  | 57.428  | 28.714            | 0.3119    | 33 | 0.9516 | 5.0           | ( 4 1 0 )  | 108.086 | 54.043 | 0.5254   |
| 11                                                                        | 1.5992 | 10.0        | ( 0 1 8 )  | 57.589  | 28.794            | 0.3127    | 34 | 0.9318 | 2.0           | ( 4 1 3 )  | 111.514 | 55.757 | 0.5366   |
| 12                                                                        | 1.4859 | 30.0        | ( 2 1 4 )  | 62.449  | 31.225            | 0.3365    | 35 | 0.9206 | 2.0           | ( 0 4 8 )  | 113.590 | 56.795 | 0.5431   |
| 13                                                                        | 1.4538 | 30.0        | ( 3 0 0 )  | 63.989  | 31.995            | 0.3439    | 36 | 0.9081 | 5.0           | ( 1 3 10 ) | 116.040 | 58.020 | 0.5506   |
| 14                                                                        | 1.4138 | 1.0         | ( 1 2 5 )  | 66.026  | 33.013            | 0.3537    | 37 | 0.8998 | 1.0           | ( 3 0 12 ) | 117.753 | 58.877 | 0.5557   |
| 15                                                                        | 1.3497 | 3.0         | ( 2 0 8 )  | 69.599  | 34.799            | 0.3705    | 38 | 0.8954 | 3.0           | ( 2 0 14 ) | 118.692 | 59.346 | 0.5584   |
| 16                                                                        | 1.3115 | 10.0        | ( 1 0 10 ) | 71.935  | 35.968            | 0.3812    | 39 | 0.8789 | 6.0           | ( 4 1 6 )  | 122.425 | 61.213 | 0.5689   |
| 17                                                                        | 1.3064 | 6.0         | ( 1 1 9 )  | 72.260  | 36.130            | 0.3827    | 40 | 0.8648 | 1.0           | ( 2 3 8 )  | 125.923 | 62.962 | 0.5782   |
| 18                                                                        | 1.2592 | 8.0         | ( 2 2 0 )  | 75.428  | 37.714            | 0.3971    | 41 | 0.8543 | 3.0           | ( 4 0 10 ) | 128.752 | 64.376 | 0.5853   |
| 19                                                                        | 1.2276 | 4.0         | ( 3 0 6 )  | 77.727  | 38.864            | 0.4073    | 42 | 0.8436 | 5.0           | ( 1 2 14 ) | 131.871 | 65.935 | 0.5927   |
| 20                                                                        | 1.2141 | 2.0         | ( 2 2 3 )  | 78.758  | 39.379            | 0.4118    | 43 | 0.8392 | 3.0           | ( 3 3 0 )  | 133.234 | 66.617 | 0.5958   |
| 21                                                                        | 1.1896 | 5.0         | ( 1 2 8 )  | 80.709  | 40.354            | 0.4203    | 44 | 0.8089 | 4.0           | ( 3 2 10 ) | 144.448 | 72.224 | 0.6181   |
| 22                                                                        | 1.1632 | 5.0         | ( 0 2 10 ) | 82.937  | 41.468            | 0.4298    | 45 | 0.8014 | 4.0           | ( 2 4 4 )  | 147.961 | 73.981 | 0.6239   |
| 23                                                                        | 1.1411 | 7.0         | ( 1 3 4 )  | 84.913  | 42.457            | 0.4382    |    |        |               |            |         |        |          |
|                                                                           |        |             |            |         |                   |           |    |        |               |            |         |        |          |
