# Supplementary material
Source: MDPI journal article supplement (https://www.mdpi.com/2073-4352/14/2/110)
Supplement: s1 [file s1]

| PDF#41-1481: QM=Common(+); d=Diffractometer; l=(Unknown)                                                                                                 |        |       |           |                                   |        |        |    |                           |      |           |         |        | PDF Card |
|----------------------------------------------------------------------------------------------------------------------------------------------------------|--------|-------|-----------|-----------------------------------|--------|--------|----|---------------------------|------|-----------|---------|--------|----------|
| Anorthite, Na-rich, disordered<br>(Ca,Na)(Si,Al)4O8                                                                                                      |        |       |           |                                   |        |        |    |                           |      |           |         |        |          |
| Radiation=CuKa1<br>Calibration=<br>Ref: Level-1 PDF                                                                                                      |        |       |           | Lambda=1.5406<br>2T=13.620-86.144 |        |        |    | Filter=<br>l/lc(RIR)=0.73 |      |           |         |        |          |
| Triclinic, P-1(2)<br>CELL: 8.1813 x 12.874 x 7.097 <93.378 x 115.968 x 90.776><br>Density(c)=2.7      Density(m)=      Mwt=      Vol=670.2<br>Ref: Ibid. |        |       |           |                                   |        |        |    | Z=4<br>P.S=               |      | mp=       |         |        |          |
|                                                                                                                                                          |        |       |           |                                   |        |        |    |                           |      |           |         |        |          |
| Strong Lines: 3.18/X 3.21/8 3.25/2 2.51/2 3.13/2 3.63/2 3.76/2 4.04/2                                                                                    |        |       |           |                                   |        |        |    |                           |      |           |         |        |          |
| 66 Lines, Wavelength to Compute Theta = 1.54056?(Cu), l%-Type = (Unknown)                                                                                |        |       |           |                                   |        |        |    |                           |      |           |         |        |          |
| #                                                                                                                                                        | d(?)   | l(f)  | ( h k l ) | 2-Theta                           | Theta  | 1/(2d) | #  | d(?)                      | l(f) | ( h k l ) | 2-Theta | Theta  | 1/(2d)   |
| 1                                                                                                                                                        | 6.4958 | 3.0   | (-1 1 0)  | 13.620                            | 6.810  | 0.0770 | 34 | 1.8486                    | 3.0  | (-4 0 3)  | 49.252  | 24.626 | 0.2705   |
| 2                                                                                                                                                        | 6.4069 | 1.0   | ( 0 2 0)  | 13.810                            | 6.905  | 0.0780 | 35 | 1.8346                    | 7.0  | ( 1-1 3)  | 49.652  | 24.826 | 0.2725   |
| 3                                                                                                                                                        | 4.6938 | 5.0   | ( 0-2 1)  | 18.891                            | 9.445  | 0.1065 | 36 | 1.8131                    | 2.0  | ( 2 6 0)  | 50.282  | 25.141 | 0.2758   |
| 4                                                                                                                                                        | 4.0441 | 17.0  | (-2 0 1)  | 21.961                            | 10.980 | 0.1236 | 37 | 1.7961                    | 7.0  | ( 1 1 3)  | 50.792  | 25.396 | 0.2784   |
| 5                                                                                                                                                        | 3.9037 | 8.0   | ( 1-1 1)  | 22.761                            | 11.380 | 0.1281 | 38 | 1.7723                    | 10.0 | (-2 0 4)  | 51.522  | 25.761 | 0.2821   |
| 6                                                                                                                                                        | 3.7635 | 18.0  | ( 1 1 1)  | 23.621                            | 11.810 | 0.1329 | 39 | 1.7590                    | 2.0  | ( 2-4 2)  | 51.942  | 25.971 | 0.2843   |
| 7                                                                                                                                                        | 3.6259 | 18.0  | ( 1 3 0)  | 24.531                            | 12.265 | 0.1379 | 40 | 1.7332                    | 3.0  | (-2-2 4)  | 52.772  | 26.386 | 0.2885   |
| 8                                                                                                                                                        | 3.4740 | 8.0   | (-1-1 2)  | 25.621                            | 12.810 | 0.1439 | 41 | 1.7107                    | 6.0  | (-4 4 2)  | 53.522  | 26.761 | 0.2923   |
| 9                                                                                                                                                        | 3.3644 | 10.0  | (-1 1 2)  | 26.471                            | 13.235 | 0.1486 | 42 | 1.6822                    | 2.0  | (-2 2 4)  | 54.502  | 27.251 | 0.2972   |
| 10                                                                                                                                                       | 3.2453 | 23.0  | (-2 2 0)  | 27.461                            | 13.730 | 0.1541 | 43 | 1.6050                    | 2.0  | ( 0 8 0)  | 57.362  | 28.681 | 0.3115   |
| 11                                                                                                                                                       | 3.2052 | 79.0  | (-2 0 2)  | 27.811                            | 13.905 | 0.1560 | 44 | 1.4895                    | 4.0  | (-2-8 1)  | 62.282  | 31.141 | 0.3357   |
| 12                                                                                                                                                       | 3.1772 | 100.0 | ( 0 0 2)  | 28.061                            | 14.030 | 0.1574 | 45 | 1.4710                    | 1.0  | (-4 6 2)  | 63.152  | 31.576 | 0.3399   |
| 13                                                                                                                                                       | 3.1270 | 19.0  | ( 2 2 0)  | 28.521                            | 14.260 | 0.1599 | 46 | 1.4547                    | 3.0  | ( 0 6 3)  | 63.942  | 31.971 | 0.3437   |
| 14                                                                                                                                                       | 3.0324 | 11.0  | ( 1-3 1)  | 29.431                            | 14.715 | 0.1649 | 47 | 1.4156                    | 1.0  | ( 2 6 2)  | 65.932  | 32.966 | 0.3532   |
| 15                                                                                                                                                       | 2.9511 | 15.0  | ( 0-4 1)  | 30.261                            | 15.130 | 0.1694 | 48 | 1.3746                    | 3.0  | ( 1-9 1)  | 68.162  | 34.081 | 0.3637   |
| 16                                                                                                                                                       | 2.9331 | 10.0  | ( 0-2 2)  | 30.451                            | 15.226 | 0.1705 | 49 | 1.3611                    | 1.0  | (-6 0 2)  | 68.932  | 34.466 | 0.3673   |
| 17                                                                                                                                                       | 2.8324 | 10.0  | ( 1 3 1)  | 31.561                            | 15.781 | 0.1765 | 50 | 1.3518                    | 5.0  | (-1-9 2)  | 69.473  | 34.736 | 0.3699   |
| 18                                                                                                                                                       | 2.7860 | 1.0   | ( 0 4 1)  | 32.101                            | 16.051 | 0.1795 | 51 | 1.3382                    | 1.0  | (-5 5 3)  | 70.283  | 35.141 | 0.3736   |
| 19                                                                                                                                                       | 2.6519 | 7.0   | (-1 3 2)  | 33.771                            | 16.886 | 0.1885 | 52 | 1.3206                    | 2.0  | (-2-4 5)  | 71.363  | 35.681 | 0.3786   |
| 20                                                                                                                                                       | 2.5135 | 19.0  | (-2 4 1)  | 35.691                            | 17.846 | 0.1989 | 53 | 1.2971                    | 2.0  | ( 5 1 1)  | 72.863  | 36.432 | 0.3855   |
| 21                                                                                                                                                       | 2.4130 | 1.0   | (-1-5 1)  | 37.231                            | 18.616 | 0.2072 | 54 | 1.2687                    | 2.0  | (-5-5 4)  | 74.763  | 37.381 | 0.3941   |
| 22                                                                                                                                                       | 2.2789 | 3.0   | (-3-3 1)  | 39.511                            | 19.756 | 0.2194 | 55 | 1.2653                    | 1.0  | ( 0-2 5)  | 75.003  | 37.501 | 0.3952   |
| 23                                                                                                                                                       | 2.2657 | 2.0   | (-1 1 3)  | 39.751                            | 19.876 | 0.2207 | 56 | 1.2596                    | 1.0  | (-4 6 4)  | 75.403  | 37.701 | 0.3970   |
| 24                                                                                                                                                       | 2.2323 | 2.0   | (-2-2 3)  | 40.371                            | 20.186 | 0.2240 | 57 | 1.2542                    | 1.0  | (-3-9 1)  | 75.783  | 37.891 | 0.3987   |
| 25                                                                                                                                                       | 2.1857 | 1.0   | (-3 3 2)  | 41.271                            | 20.636 | 0.2288 | 58 | 1.2195                    | 2.0  | ( 4 4 2)  | 78.343  | 39.172 | 0.4100   |
| 26                                                                                                                                                       | 2.1391 | 10.0  | ( 0 6 0)  | 42.211                            | 21.106 | 0.2337 | 59 | 1.2129                    | 1.0  | (-2-6 5)  | 78.853  | 39.427 | 0.4122   |
| 27                                                                                                                                                       | 2.0979 | 7.0   | ( 1 5 1)  | 43.081                            | 21.541 | 0.2383 | 60 | 1.2100                    | 1.0  | ( 3 9 0)  | 79.073  | 39.536 | 0.4132   |
| 28                                                                                                                                                       | 2.0910 | 1.0   | (-3 1 3)  | 43.232                            | 21.616 | 0.2391 | 61 | 1.1684                    | 2.0  | ( 1-9 3)  | 82.484  | 41.242 | 0.4279   |
| 29                                                                                                                                                       | 2.0213 | 3.0   | (-4 0 2)  | 44.802                            | 22.401 | 0.2474 | 62 | 1.1664                    | 2.0  | (-4 0 6)  | 82.663  | 41.331 | 0.4287   |
| 30                                                                                                                                                       | 2.0170 | 1.0   | (-4 0 1)  | 44.902                            | 22.451 | 0.2479 | 63 | 1.1623                    | 2.0  | ( 2-8 3)  | 83.014  | 41.507 | 0.4302   |
| 31                                                                                                                                                       | 1.9869 | 2.0   | ( 0 6 1)  | 45.622                            | 22.811 | 0.2517 | 64 | 1.1535                    | 2.0  | (-4-8 4)  | 83.793  | 41.897 | 0.4335   |
| 32                                                                                                                                                       | 1.9290 | 3.0   | (-4 2 2)  | 47.072                            | 23.536 | 0.2592 | 65 | 1.1437                    | 1.0  | ( 5 1 2)  | 84.673  | 42.337 | 0.4372   |
| 33                                                                                                                                                       | 1.8801 | 3.0   | ( 2 2 2)  | 48.372                            | 24.186 | 0.2659 | 66 | 1.1279                    | 1.0  | (-6-4 0)  | 86.144  | 43.072 | 0.4433   |
|                                                                                                                                                          |        |       |           |                                   |        |        |    |                           |      |           |         |        |          |
