# Supplementary material
Source: MDPI journal article supplement (https://www.mdpi.com/2073-4352/14/2/110)
Supplement: s1 [file s1]

| PDF#41-1370: QM=Common(+); d=Diffractometer; l=(Unknown)                                                                                                |        |       |           |         |                                   |        |      |           |         |                          |        |      | PDF Card  |         |
|---------------------------------------------------------------------------------------------------------------------------------------------------------|--------|-------|-----------|---------|-----------------------------------|--------|------|-----------|---------|--------------------------|--------|------|-----------|---------|
| Diopside<br>Ca(Mg,Al)(Si,Al)2O6                                                                                                                         |        |       |           |         |                                   |        |      |           |         |                          |        |      |           |         |
| Radiation=CuKa1<br>Calibration=<br>Ref: Level-1 PDF                                                                                                     |        |       |           |         | Lambda=1.5406<br>2T=13.750-79.430 |        |      |           |         | Filter=<br>l/lc(RIR)=0.8 |        |      |           |         |
| Monoclinic, C2/c(15)<br>CELL: 9.732 x 8.867 x 5.2787 <90.0 x 105.92 x 90.0><br>Density(c)=3.395      Density(m)=      Mwt=      Vol=438.0<br>Ref: Ibid. |        |       |           |         |                                   |        |      |           |         | Z=4<br>P.S=              |        | mp=  |           |         |
|                                                                                                                                                         |        |       |           |         |                                   |        |      |           |         |                          |        |      |           |         |
| Strong Lines: 2.98/X 2.94/6 3.22/5 2.54/4 2.51/3 2.89/3 2.56/2 1.42/2                                                                                   |        |       |           |         |                                   |        |      |           |         |                          |        |      |           |         |
| 91 Lines, Wavelength to Compute Theta = 1.54056?(Cu), l%-Type = (Unknown)                                                                               |        |       |           |         |                                   |        |      |           |         |                          |        |      |           |         |
| #                                                                                                                                                       | d(?)   | l(f)  | ( h k l ) | 2-Theta | #                                 | d(?)   | l(f) | ( h k l ) | 2-Theta | #                        | d(?)   | l(f) | ( h k l ) | 2-Theta |
| 1                                                                                                                                                       | 6.4350 | 1.0   | (-1 1 0)  | 13.750  | 32                                | 1.9430 | 1.0  | (-2 4 1)  | 46.711  | 63                       | 1.4417 | 1.0  | ( 4 2 2)  | 64.591  |
| 2                                                                                                                                                       | 4.6830 | 3.0   | ( 2 0 0)  | 18.935  | 33                                | 1.8550 | 2.0  | ( 3 3 1)  | 49.070  | 64                       | 1.4226 | 1.0  | ( 3 5 1)  | 65.566  |
| 3                                                                                                                                                       | 4.4340 | 6.0   | ( 0 2 0)  | 20.008  | 34                                | 1.8370 | 2.0  | (-4 2 2)  | 49.583  | 65                       | 1.4192 | 20.0 | ( 5 3 1)  | 65.743  |
| 4                                                                                                                                                       | 4.4110 | 3.0   | (-1 1 1)  | 20.114  | 35                                | 1.8320 | 18.0 | ( 2 2 2)  | 49.727  | 66                       | 1.4093 | 2.0  | (-2 6 0)  | 66.264  |
| 5                                                                                                                                                       | 3.6660 | 2.0   | ( 1 1 1)  | 24.258  | 36                                | 1.8130 | 2.0  | ( 1 3 2)  | 50.284  | 67                       | 1.4042 | 12.0 | (-3 5 2)  | 66.536  |
| 6                                                                                                                                                       | 3.3390 | 6.0   | ( 0 2 1)  | 26.676  | 37                                | 1.7930 | 1.0  | ( 2 4 1)  | 50.885  | 68                       | 1.4006 | 2.0  | ( 1 3 3)  | 66.729  |
| 7                                                                                                                                                       | 3.2200 | 50.0  | (-2 2 0)  | 27.681  | 38                                | 1.7720 | 1.0  | ( 4 2 1)  | 51.532  | 69                       | 1.3934 | 2.0  | ( 2 2 3)  | 67.119  |
| 8                                                                                                                                                       | 2.9850 | 100.0 | (-2 2 1)  | 29.909  | 39                                | 1.7420 | 9.0  | (-1 5 0)  | 52.486  | 70                       | 1.3741 | 4.0  | (-2 4 3)  | 68.191  |
| 9                                                                                                                                                       | 2.9430 | 55.0  | (-3 1 0)  | 30.346  | 40                                | 1.7190 | 4.0  | (-5 1 2)  | 53.243  | 71                       | 1.3298 | 8.0  | ( 2 6 1)  | 70.795  |
| 10                                                                                                                                                      | 2.8910 | 30.0  | (-3 1 1)  | 30.905  | 41                                | 1.7150 | 2.0  | ( 3 1 2)  | 53.377  | 72                       | 1.3256 | 8.0  | ( 5 1 2)  | 71.053  |
| 11                                                                                                                                                      | 2.8190 | 2.0   | (-1 3 0)  | 31.715  | 42                                | 1.6750 | 2.0  | (-1 5 1)  | 54.757  | 73                       | 1.3221 | 3.0  | (-7 1 0)  | 71.270  |
| 12                                                                                                                                                      | 2.5550 | 20.0  | (-1 3 1)  | 35.093  | 43                                | 1.6710 | 10.0 | (-2 4 2)  | 54.899  | 74                       | 1.3197 | 2.0  | (-2 0 4)  | 71.419  |
| 13                                                                                                                                                      | 2.5400 | 40.0  | (-2 0 2)  | 35.307  | 44                                | 1.6650 | 1.0  | (-3 1 3)  | 55.114  | 75                       | 1.3177 | 1.0  | (-5 3 3)  | 71.544  |
| 14                                                                                                                                                      | 2.5300 | 16.0  | (-1 1 2)  | 35.451  | 45                                | 1.6300 | 6.0  | (-2 2 3)  | 56.402  | 76                       | 1.2944 | 1.0  | (-4 4 3)  | 73.038  |
| 15                                                                                                                                                      | 2.5120 | 30.0  | ( 2 2 1)  | 35.714  | 46                                | 1.6240 | 8.0  | (-4 4 1)  | 56.629  | 77                       | 1.2928 | 4.0  | (-3 1 4)  | 73.143  |
| 16                                                                                                                                                      | 2.3820 | 2.0   | ( 1 3 1)  | 37.734  | 47                                | 1.6200 | 10.0 | (-5 3 1)  | 56.781  | 78                       | 1.2775 | 4.0  | (-2 6 2)  | 74.164  |
| 17                                                                                                                                                      | 2.3390 | 1.0   | ( 4 0 0)  | 38.455  | 48                                | 1.6100 | 5.0  | (-4 4 0)  | 57.166  | 79                       | 1.2757 | 3.0  | (-6 4 0)  | 74.286  |
| 18                                                                                                                                                      | 2.3010 | 14.0  | ( 3 1 1)  | 39.116  | 49                                | 1.5920 | 2.0  | ( 5 1 1)  | 57.874  | 80                       | 1.2712 | 2.0  | (-4 0 4)  | 74.594  |
| 19                                                                                                                                                      | 2.2280 | 4.0   | (-3 1 2)  | 40.452  | 50                                | 1.5810 | 4.0  | (-5 3 0)  | 58.315  | 81                       | 1.2691 | 1.0  | ( 0 0 4)  | 74.739  |
| 20                                                                                                                                                      | 2.2230 | 9.0   | ( 1 1 2)  | 40.547  | 51                                | 1.5600 | 3.0  | ( 6 0 0)  | 59.177  | 82                       | 1.2584 | 4.0  | (-6 4 2)  | 75.485  |
| 21                                                                                                                                                      | 2.2170 | 5.0   | ( 0 4 0)  | 40.662  | 52                                | 1.5418 | 4.0  | (-3 5 0)  | 59.947  | 83                       | 1.2561 | 2.0  | ( 4 4 2)  | 75.647  |
| 22                                                                                                                                                      | 2.2040 | 12.0  | (-2 2 2)  | 40.912  | 53                                | 1.5291 | 3.0  | (-6 0 2)  | 60.496  | 84                       | 1.2466 | 8.0  | (-5 5 2)  | 76.327  |
| 23                                                                                                                                                      | 2.1460 | 16.0  | (-3 3 0)  | 42.070  | 54                                | 1.5236 | 10.0 | ( 4 0 2)  | 60.738  | 85                       | 1.2292 | 1.0  | (-1 7 1)  | 77.607  |
| 24                                                                                                                                                      | 2.1250 | 18.0  | (-3 3 1)  | 42.506  | 55                                | 1.5075 | 6.0  | (-5 3 2)  | 61.456  | 86                       | 1.2253 | 1.0  | (-3 5 3)  | 77.901  |
| 25                                                                                                                                                      | 2.1020 | 12.0  | (-4 2 1)  | 42.994  | 56                                | 1.5047 | 5.0  | ( 3 3 2)  | 61.583  | 87                       | 1.2239 | 2.0  | (-7 3 2)  | 78.007  |
| 26                                                                                                                                                      | 2.0690 | 1.0   | (-4 2 0)  | 43.715  | 57                                | 1.5003 | 2.0  | (-4 2 3)  | 61.783  | 88                       | 1.2215 | 2.0  | ( 3 3 3)  | 78.189  |
| 27                                                                                                                                                      | 2.0320 | 12.0  | ( 0 4 1)  | 44.553  | 58                                | 1.4911 | 2.0  | (-4 4 2)  | 62.207  | 89                       | 1.2182 | 1.0  | (-7 3 0)  | 78.441  |
| 28                                                                                                                                                      | 2.0180 | 7.0   | (-4 0 2)  | 44.879  | 59                                | 1.4779 | 3.0  | ( 0 6 0)  | 62.825  | 90                       | 1.2083 | 1.0  | ( 1 7 1)  | 79.210  |
| 29                                                                                                                                                      | 2.0120 | 7.0   | ( 2 0 2)  | 45.020  | 60                                | 1.4714 | 2.0  | (-6 2 0)  | 63.135  | 91                       | 1.2055 | 1.0  | (-5 1 4)  | 79.430  |
| 30                                                                                                                                                      | 2.0030 | 3.0   | (-2 4 0)  | 45.233  | 61                                | 1.4569 | 2.0  | ( 4 4 1)  | 63.837  |                          |        |      |           |         |
| 31                                                                                                                                                      | 1.9690 | 6.0   | (-1 3 2)  | 46.059  | 62                                | 1.4522 | 1.0  | (-5 1 3)  | 64.068  |                          |        |      |           |         |
|                                                                                                                                                         |        |       |           |         |                                   |        |      |           |         |                          |        |      |           |         |
