# Supplementary material
Source: MDPI journal article supplement (https://www.mdpi.com/2073-4352/14/2/110)
Supplement: s1 [file s1]

| PDF#41-1483: QM=Common(+); d=Diffractometer; l=(Unknown)                  |        |             |           |         |        |                  |    |        |      |                |         |        | PDF Card |
|---------------------------------------------------------------------------|--------|-------------|-----------|---------|--------|------------------|----|--------|------|----------------|---------|--------|----------|
| Augite, Al-rich<br>Ca(Mg,Fe,Al)(Si,Al)2O6                                 |        |             |           |         |        |                  |    |        |      |                |         |        |          |
| Radiation=CuKa1                                                           |        |             |           |         |        | Lambda=1.5406    |    |        |      | Filter=        |         |        |          |
| Calibration=                                                              |        |             |           |         |        | 2T=19.951-84.613 |    |        |      | I/Ic(RIR)=0.56 |         |        |          |
| Ref: Level-1 PDF                                                          |        |             |           |         |        |                  |    |        |      |                |         |        |          |
| Monoclinic, C2/c(15)                                                      |        |             |           |         |        |                  |    |        |      |                |         |        |          |
| CELL: 9.7428 x 8.8942 x 5.2723 <90.0 x 106.111 x 90.0>                    |        |             |           |         |        |                  |    |        |      |                |         |        |          |
| Density(c)=3.23                                                           |        | Density(m)= |           | Mwt=    |        | Vol=438.9        |    | Z=4    |      | mp=            |         |        |          |
| P.S=                                                                      |        |             |           |         |        |                  |    |        |      |                |         |        |          |
| Ref: Ibid.                                                                |        |             |           |         |        |                  |    |        |      |                |         |        |          |
| Strong Lines: 2.99/X 3.22/7 2.94/6 2.51/5 2.56/4 2.90/3 2.13/3 2.53/3     |        |             |           |         |        |                  |    |        |      |                |         |        |          |
| 50 Lines, Wavelength to Compute Theta = 1.54056?(Cu), I%-Type = (Unknown) |        |             |           |         |        |                  |    |        |      |                |         |        |          |
| #                                                                         | d(?)   | I(f)        | ( h k l ) | 2-Theta | Theta  | 1/(2d)           | #  | d(?)   | I(f) | ( h k l )      | 2-Theta | Theta  | 1/(2d)   |
| 1                                                                         | 4.4467 | 7.0         | ( 0 2 0 ) | 19.951  | 9.975  | 0.1124           | 26 | 1.6659 | 5.0  | (-3 1 3)       | 55.082  | 27.541 | 0.3001   |
| 2                                                                         | 3.3470 | 7.0         | ( 0 2 1 ) | 26.611  | 13.305 | 0.1494           | 27 | 1.6284 | 16.0 | (-2 2 3)       | 56.462  | 28.231 | 0.3070   |
| 3                                                                         | 3.2223 | 67.0        | ( 2 2 0 ) | 27.661  | 13.830 | 0.1552           | 28 | 1.6229 | 18.0 | (-5 3 1)       | 56.672  | 28.336 | 0.3081   |
| 4                                                                         | 2.9906 | 100.0       | (-2 2 1)  | 29.851  | 14.925 | 0.1672           | 29 | 1.6119 | 12.0 | ( 4 4 0)       | 57.092  | 28.546 | 0.3102   |
| 5                                                                         | 2.9416 | 63.0        | ( 3 1 0)  | 30.361  | 15.181 | 0.1700           | 30 | 1.5816 | 5.0  | ( 5 3 0)       | 58.292  | 29.146 | 0.3161   |
| 6                                                                         | 2.8960 | 33.0        | (-3 1 1)  | 30.851  | 15.426 | 0.1727           | 31 | 1.5589 | 10.0 | ( 6 0 0)       | 59.222  | 29.611 | 0.3207   |
| 7                                                                         | 2.5601 | 39.0        | (-1 3 1)  | 35.021  | 17.511 | 0.1953           | 32 | 1.5445 | 10.0 | ( 3 5 0)       | 59.832  | 29.916 | 0.3237   |
| 8                                                                         | 2.5314 | 28.0        | ( 0 0 2)  | 35.431  | 17.716 | 0.1975           | 33 | 1.5317 | 8.0  | (-6 0 2)       | 60.382  | 30.191 | 0.3264   |
| 9                                                                         | 2.5108 | 51.0        | ( 2 2 1)  | 35.731  | 17.866 | 0.1991           | 34 | 1.5203 | 5.0  | ( 4 0 2)       | 60.882  | 30.441 | 0.3289   |
| 10                                                                        | 2.2984 | 27.0        | ( 3 1 1)  | 39.161  | 19.581 | 0.2175           | 35 | 1.5058 | 10.0 | (-1 3 3)       | 61.532  | 30.766 | 0.3320   |
| 11                                                                        | 2.2165 | 8.0         | ( 1 1 2)  | 40.671  | 20.336 | 0.2256           | 36 | 1.4824 | 5.0  | ( 0 6 0)       | 62.612  | 31.306 | 0.3373   |
| 12                                                                        | 2.1999 | 8.0         | ( 0 2 2)  | 40.991  | 20.496 | 0.2273           | 37 | 1.4223 | 21.0 | ( 0 6 1)       | 65.582  | 32.791 | 0.3515   |
| 13                                                                        | 2.1493 | 23.0        | ( 3 3 0)  | 42.001  | 21.001 | 0.2326           | 38 | 1.4184 | 4.0  | ( 5 3 1)       | 65.783  | 32.891 | 0.3525   |
| 14                                                                        | 2.1295 | 30.0        | (-3 3 1)  | 42.411  | 21.206 | 0.2348           | 39 | 1.4080 | 11.0 | (-3 5 2)       | 66.332  | 33.166 | 0.3551   |
| 15                                                                        | 2.1068 | 13.0        | (-4 2 1)  | 42.891  | 21.446 | 0.2373           | 40 | 1.4050 | 3.0  | ( 1 5 2)       | 66.492  | 33.246 | 0.3559   |
| 16                                                                        | 2.0360 | 17.0        | ( 0 4 1)  | 44.461  | 22.231 | 0.2456           | 41 | 1.3901 | 3.0  | ( 2 2 3)       | 67.302  | 33.651 | 0.3597   |
| 17                                                                        | 2.0200 | 11.0        | (-4 0 2)  | 44.832  | 22.416 | 0.2475           | 42 | 1.3313 | 10.0 | (-7 1 2)       | 70.703  | 35.351 | 0.3756   |
| 18                                                                        | 2.0073 | 9.0         | ( 2 4 0)  | 45.131  | 22.566 | 0.2491           | 43 | 1.3250 | 10.0 | ( 6 2 1)       | 71.093  | 35.546 | 0.3774   |
| 19                                                                        | 1.9681 | 3.0         | (-1 3 2)  | 46.082  | 23.041 | 0.2541           | 44 | 1.3195 | 2.0  | (-5 3 3)       | 71.432  | 35.716 | 0.3789   |
| 20                                                                        | 1.8952 | 2.0         | (-5 1 1)  | 47.962  | 23.981 | 0.2638           | 45 | 1.2790 | 11.0 | ( 0 6 2)       | 74.063  | 37.031 | 0.3909   |
| 21                                                                        | 1.8542 | 4.0         | ( 3 3 1)  | 49.092  | 24.546 | 0.2697           | 46 | 1.2601 | 4.0  | (-4 6 1)       | 75.363  | 37.681 | 0.3968   |
| 22                                                                        | 1.8315 | 11.0        | ( 5 1 0)  | 49.742  | 24.871 | 0.2730           | 47 | 1.2450 | 6.0  | ( 3 5 2)       | 76.443  | 38.222 | 0.4016   |
| 23                                                                        | 1.7477 | 17.0        | ( 1 5 0)  | 52.302  | 26.151 | 0.2861           | 48 | 1.1925 | 1.0  | ( 2 6 2)       | 80.473  | 40.236 | 0.4193   |
| 24                                                                        | 1.7224 | 2.0         | (-5 1 2)  | 53.132  | 26.566 | 0.2903           | 49 | 1.1840 | 3.0  | ( 1 5 3)       | 81.173  | 40.587 | 0.4223   |
| 25                                                                        | 1.6715 | 5.0         | ( 0 4 2)  | 54.882  | 27.441 | 0.2991           | 50 | 1.1444 | 2.0  | (-1 7 2)       | 84.613  | 42.307 | 0.4369   |
